# Supplementary material
Source: PubMed Central journal article supplement (PMC7250694)
Supplement: BLT-18-208_Online_Supplemetary_Content.pdf [file BLT-18-208_Online_Supplemetary_Content.pdf]

**ONLINE SUPPLEMENTARY CONTENT****Table SI - Accrual and results of clinical trial**

| N  | Code   | Arm  | Initial measure<br>(Area cm <sup>2</sup> ) | Measure at 4 weeks                                 | Measure at 4 month                                 |
|----|--------|------|--------------------------------------------|----------------------------------------------------|----------------------------------------------------|
|    |        |      |                                            | Area cm <sup>2</sup><br>(% of reduction to/closed) | Area cm <sup>2</sup><br>(% of reduction to/closed) |
| 1  | BST-01 | CBPG | Withdrawn                                  | n.a.                                               | n.a.                                               |
| 2  | BST-02 | CBPG | 0.98                                       | 0.55 (44%) [8 CBPG]                                | 0.28 (71%)                                         |
| 3  | BST-03 | STD  | 0.42                                       | healed at 3 weeks (V5; 100%)                       | 0 (100%)                                           |
| 4  | BST-04 | STD  | 0.8                                        | 0.3 (62.5%)                                        | 0.6 (25%)                                          |
| 5  | BST-05 | CBPG | Withdrawn                                  | n.a.                                               | n.a.                                               |
| 6  | BST-06 | CBPG | Withdrawn                                  | n.a.                                               | n.a.                                               |
| 7  | BST-07 | STD  | Withdrawn                                  | n.a.                                               | n.a.                                               |
| 8  | BST-08 | CBPG | 0.25                                       | healed at 3 weeks (V5; 100%) [5 CBPG]              | 0 (100%)                                           |
| 9  | BST-09 | STD  | 0.25                                       | Infected at week 2 (V4)                            |                                                    |
| 10 | BST-10 | CBPG | 10.4                                       | 8.4 (20%) [8 CBPG]                                 | 0 (100%)                                           |
| 11 | BST-11 | STD  | Withdrawn                                  | n.a.                                               | n.a.                                               |

CBPG: cord blood platelet gel; STD: standard treatment; n.a.: not applicable.

**Table SII - Potential CBPC production based on banking activity**

| Year          | No. of WCB units collected | No. (%) of units processed for stem cell bank | No. (%) of potential* units for CBPC |
|---------------|----------------------------|-----------------------------------------------|--------------------------------------|
| 2014          | 8,031                      | 1,317 (16%)                                   | 4,489 (56%)                          |
| 2015          | 6,510                      | 748 (11%)                                     | 3,621 (55%)                          |
| 2016          | 4,973                      | 580 (11%)                                     | 3,712 (74%)                          |
| 2017          | 4,221                      | 459 (11%)                                     | 3,111 (74%)                          |
| 2018          | 3,397                      | 333 (10%)                                     | 2,086 (62%)                          |
| <b>Median</b> | <b>4,973</b>               | <b>580 (11%)</b>                              | <b>3,621 (62%)</b>                   |

\*CB units used for cryopreservation for HPC product and potential. CB units to prepare CBP product.

CBPC: cord blood platelet concentrates; WCB: whole cord blood

**Table SIII - Costs incurred for CBPC manufacturing in BST**

| Item                              | Cost (€)     |
|-----------------------------------|--------------|
| <b>Consumables</b>                | 20.2         |
| <b>Quality Controls</b>           | 70.4         |
| <b>Labor</b>                      | 29.5         |
| <b>Facilities and maintenance</b> | 36           |
| <b>Total</b>                      | <b>156.1</b> |

CBPC: cord blood platelet concentrates.
